# Supplementary material for: Effects of Acute Hypoglycemia on Inflammatory and Pro-atherothrombotic Biomarkers in Individuals With Type 1 Diabetes and Healthy Individuals
Source: PubMed Central journal article supplement — Diabetes Care. 2010 Jul;33(7):1529–35. doi: 10.2337/dc09-0354 (PMC2890354; doi:10.2337/dc09-0354), 2010-07

## ONLINE APPENDIX

**Supplemental Table 1. Baseline demographic values of non diabetic subjects and patients with type 1 diabetes**

| Units And Normal ranges | AGE Year | BMI kg/m <sup>2</sup> | HbA1c %<br>4.0 - 6.5 | Hgb g/dL<br>M -14.0-18.1<br>F 11.8-16 | K+ mEq/L<br>3.5 - 5.1 | Total Bilirubin mg/dL<br>0.70 - 1.5 | Creatinine mg/dL<br>0.2 - 1.2 | AST U/L<br>4.0 - 40 | ALT U/L<br>4.0 - 40 | BP mmHg    | Type 1 DM on insulin Pump % | Type 1 DM On multiple insulin injections% | Duration of diabetes |
|-------------------------|----------|-----------------------|----------------------|---------------------------------------|-----------------------|-------------------------------------|-------------------------------|---------------------|---------------------|------------|-----------------------------|-------------------------------------------|----------------------|
| Healthy eugly           | 32±2     | 28±2                  | 5.5±0.1              | 14±2                                  | 3.9±0.1               | 0.98±0.1                            | 0.9±0.04                      | 26±2                | 24 ±4               | 117/69±3/2 | -                           | -                                         | -                    |
| Healthy hypo            | 33±2     | 25±1                  | 5±0.1                | 14±1                                  | 4±0.1                 | 0.78±0.09                           | 0.9±0.04                      | 28±2                | 23 ±2               | 115/72±3/2 | -                           | -                                         | -                    |
| T1DM eugly              | 29±3     | 28±2                  | 8±0.5                | 14±0.5                                | 4.1±0.2               | 0.48±0.04                           | 0.79±0.04                     | 27±4                | 31±4                | 119/76±6/3 | 60                          | 40                                        | 19±4                 |
| T1DM hypo               | 33±3     | 25±1                  | 7.5±0.2              | 15±0.2                                | 4±0.1                 | 0.56±0.05                           | 0.85±0.04                     | 26±3                | 23±3                | 118/75±6/3 | 66                          | 34                                        | 18±3                 |

Hypo-hypoglycemia

Eugly-euglycemia

Hgb- hemoglobin

AST-Aspartate Aminotransferase

ALT-Alanine Aminotransferase

**Supplemental Table 2. Comparison of baseline concentrations of cardiovascular markers in full cohort of non diabetic and type 1 diabetic subjects who participated in either euglycemic or hypoglycemic studies.**

|                    | Non Diabetic Subjects |           | Type 1 Diabetic Subjects |           |
|--------------------|-----------------------|-----------|--------------------------|-----------|
|                    | Eugly                 | Hypo      | Eugly                    | Hypo      |
| (ng/ml)            | Baseline              | Baseline  | Baseline                 | Baseline  |
| ICAM               | 89±7                  | 79±7      | 88±3                     | 73±4*     |
| VCAM               | 844±42                | 675±39*   | 969±42                   | 871±47    |
| E-selectin         | 21±2                  | 17±2      | 20±2                     | 21±2      |
| P-selectin (pg/mL) | 75±8                  | 61±8      | 89±13                    | 67±9      |
| PAI-1              | 29±4                  | 24±4      | 40±6                     | 23±3*     |
| tPA                | 5.3±0.9               | 5.3±0.8   | 4.1±0.4                  | 3.5±0.3   |
| IL-6 (pg/mL)       | 15±4                  | 14.5±4    | 8±3                      | 16±7      |
| TNF- $\alpha$      | 2.3±0.4               | 2.7±0.5   | 1.3±0.3                  | 2.4±0.5   |
| VEGF (pg/mL)       | 27±8                  | 17±5      | 19.5±7                   | 13±7      |
| Adiponectin        | 10660±617             | 10600±634 | 13370±924                | 14350±803 |

\*p<0.05 –Hypoglycemia baseline values compared to euglycemia baseline

**Supplemental Table 3. Comparison of baseline concentrations of cardiovascular markers before euglycemic and hypoglycemic clamps in non diabetic subjects and type 1 diabetic subjects undergoing both protocols.**

|                    | Non Diabetic Subjects |           | Type 1 Diabetic Subjects |            |
|--------------------|-----------------------|-----------|--------------------------|------------|
|                    | Eugly                 | Hypo      | Eugly                    | Hypo       |
| (ng/ml)            | Baseline              | Baseline  | Baseline                 | Baseline   |
| ICAM               | 90±12                 | 86±7      | 86±3                     | 78±7       |
| VCAM               | 862±53                | 728±67    | 999±42                   | 990±58     |
| E-selectin         | 24±4                  | 20±3      | 22±4                     | 21±5       |
| P-selectin (pg/mL) | 90±13                 | 64±15     | 71±21                    | 67±9       |
| PAI-1              | 24±5                  | 14±4      | 36±7                     | 18±4*      |
| tPA                | 5.2±2                 | 4.4±2     | 4±1                      | 3±1        |
| IL-6 (pg/mL)       | 19±6                  | 21±10     | 3±1                      | 3±1        |
| TNF- $\alpha$      | 3±0.5                 | 3±0.5     | 2±0.4                    | 2±0.8      |
| VEGF (pg/mL)       | 42±16                 | 18±10     | 34±12                    | 33±17      |
| Adiponectin        | 9855±1061             | 9310±1277 | 13613±1692               | 15869±1732 |

\*p<0.05 –Hypoglycemia baseline values compared to euglycemia baseline.

Figure A1. Effects of hyperinsulinemic euglycemia and hypoglycemia in overnight fasted healthy controls (n=10) and type 1 DM (n=7) subjects whom underwent both clamps on vascular biologic markers. Responses of V-CAM, E-selectin and VEGF were significantly increased during hypoglycemia as compared to euglycemia in healthy controls. Responses of VCAM, E-selectin and VEGF are significantly increased during hypoglycemia as compared to euglycemia in T1DM. Statistical difference with two-way ANOVA during the 120 min clamp experiments is marked in each graph panel.

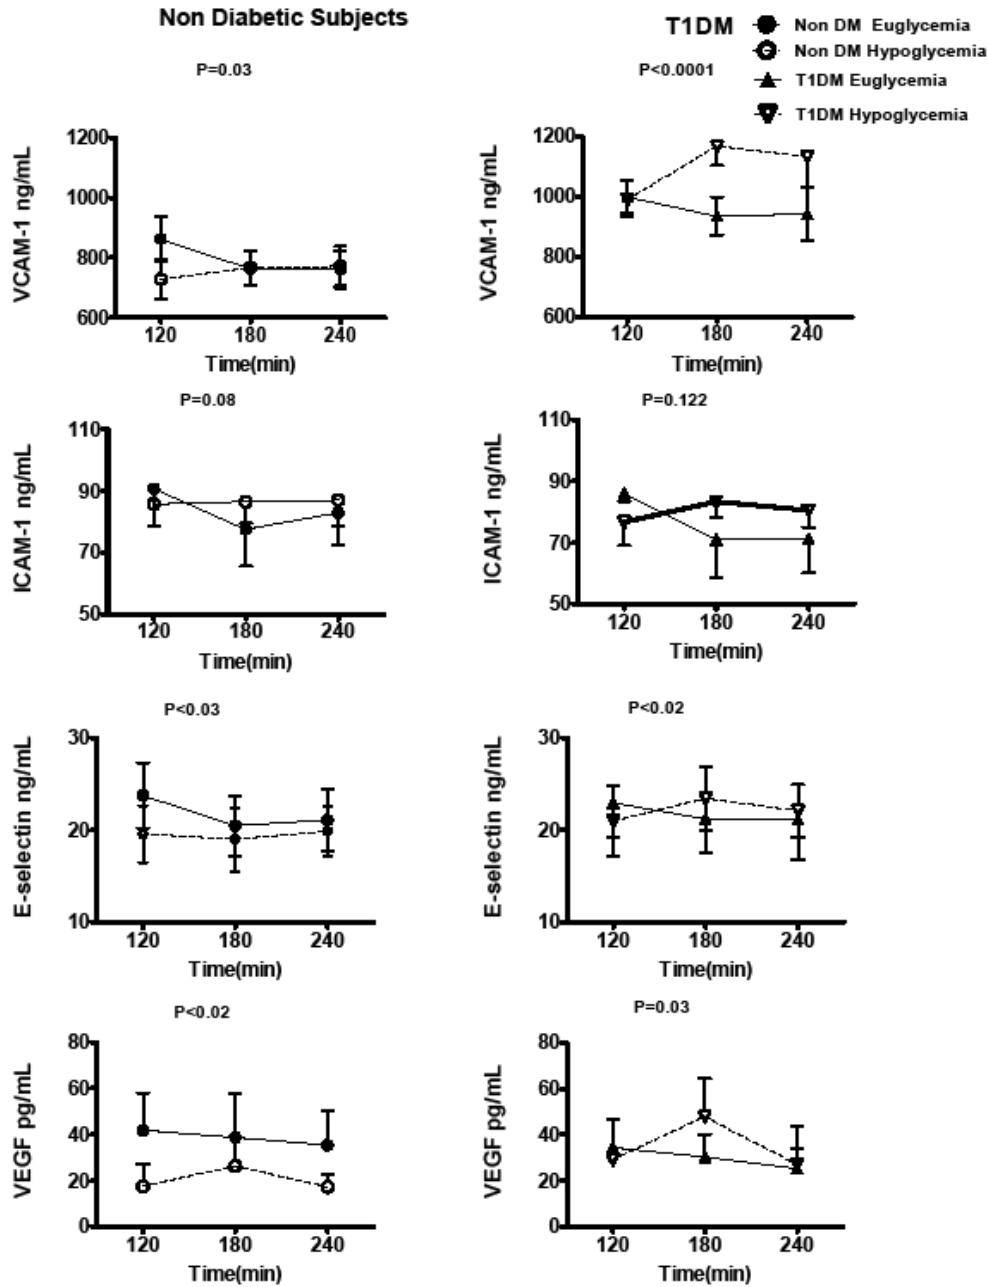

Figure A2. Effects of hyperinsulinemic euglycemia and hypoglycemia in overnight fasted healthy controls (n=10) and type 1 DM (n=7) subjects whom underwent both clamps on vascular biologic markers. Responses of PAI-1, P-selectin and adiponectin were significantly increased during hypoglycemia as compared to euglycemia in healthy controls. Statistical difference with two-way ANOVA during the 120 min clamp experiments is marked in each graph panel.

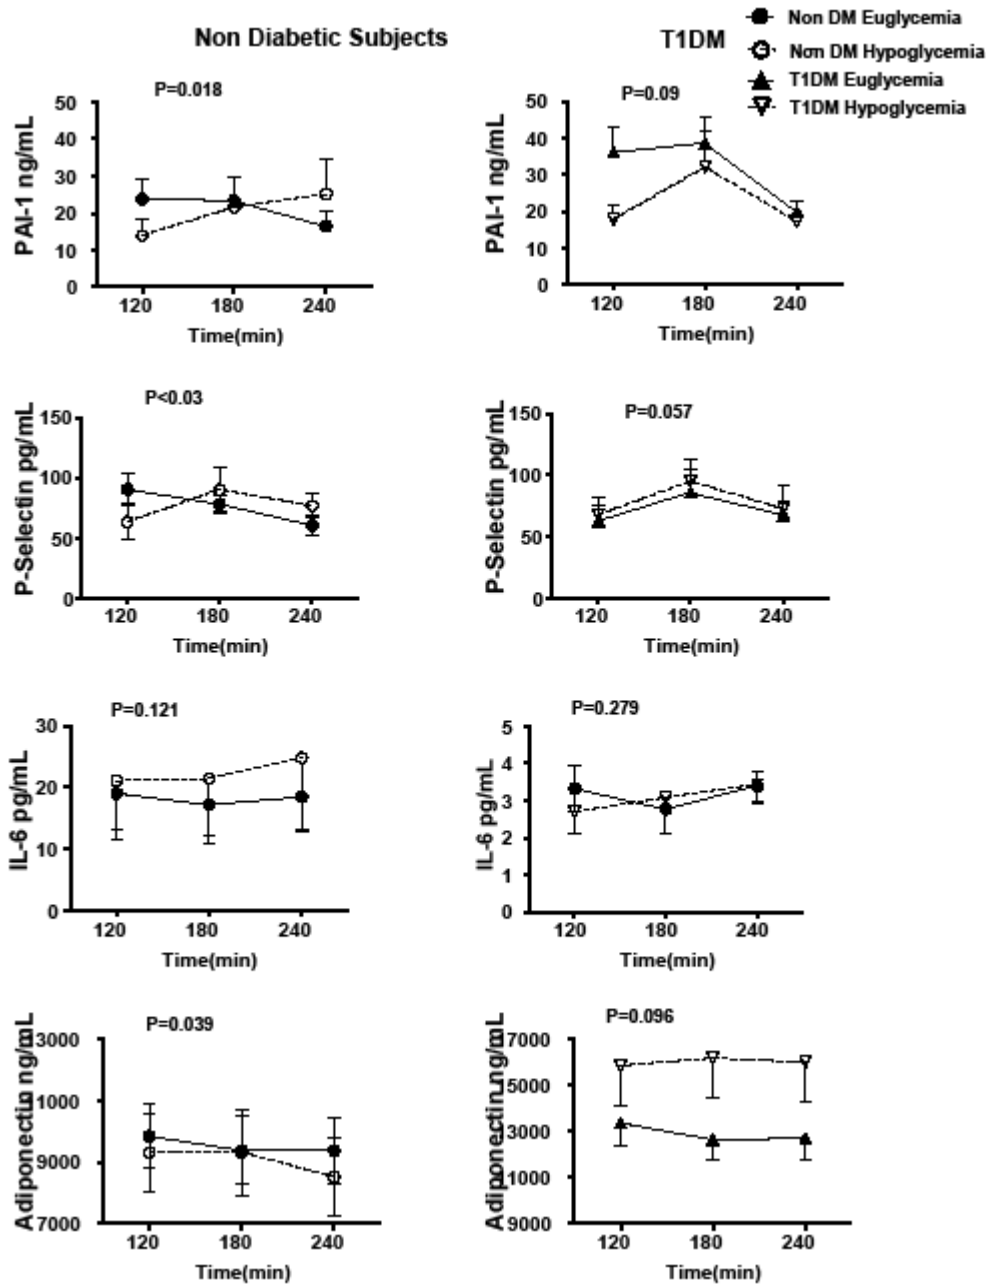

Figure A3. Glucose and insulin levels during the 2 hr hyperinsulinemic (9pmol/kg/min) euglycemic and hypoglycemic clamps in control and T1DM patients. Values are mean $\pm$ SE.

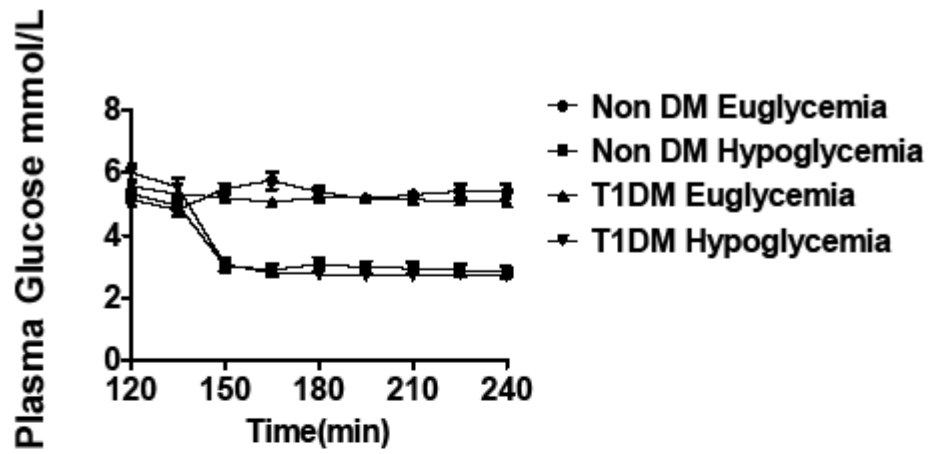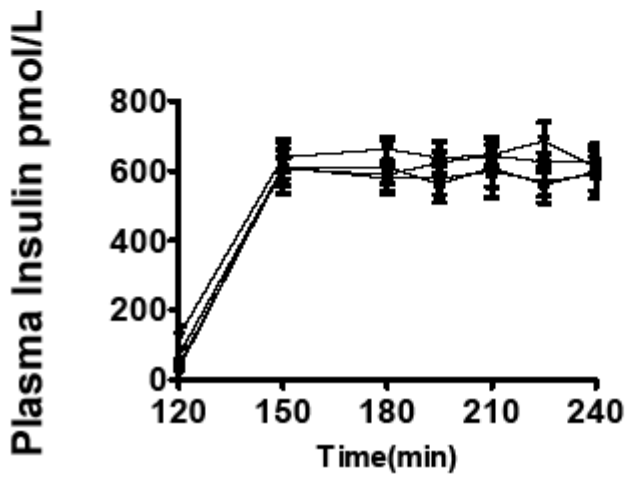

Supplement: supp_dc09-0354_onlineappendix.pdf [file supp_dc09-0354_onlineappendix.pdf]
